# Supplementary material for: Rational design of metal organic framework-derived FeS2 hollow nanocages@reduced graphene oxide for K-ion storage
Source: Royal Society of Chemistry journal article supplement (doi:10.1039/c8nr05239e), 2018-01-01
Supplement: c8nr05239e1.pdf [file c8nr05239e1.pdf]

## Rational design of metal organic frameworks-derived FeS<sub>2</sub> hollow nanocages@reduced graphene oxide for K-ion storage

Junpeng Xie,<sup>a</sup> Yongqian Zhu,<sup>a</sup> Ning Zhuang,<sup>a</sup> Hang Lei,<sup>ab</sup> Weiling Zhu<sup>c</sup>, Yong Fu,<sup>a</sup>

Muhammad Sufyan Javed,<sup>a</sup> Jinliang Li,<sup>\*a</sup> Wenjie Mai<sup>\*a</sup>

<sup>a</sup>*Siyuan Laboratory, Guangdong Provincial Engineering Technology Research Center of Vacuum Coating Technologies and New Energy Materials, Department of Physics, Jinan University, Guangzhou 510632, People's Republic of China. E-mail: lijnliang@email.jnu.edu.cn (Jinliang Li); wenjiemai@gmail.com (Wenjie Mai)*

<sup>b</sup>*Department of Chemistry, Jinan University, Guangzhou, Guangdong 510632, People's Republic of China.*

<sup>c</sup>*School of Science, Guangdong University of Petrochemical Technology, Maoming, Guangdong 525000, People's Republic of China.*

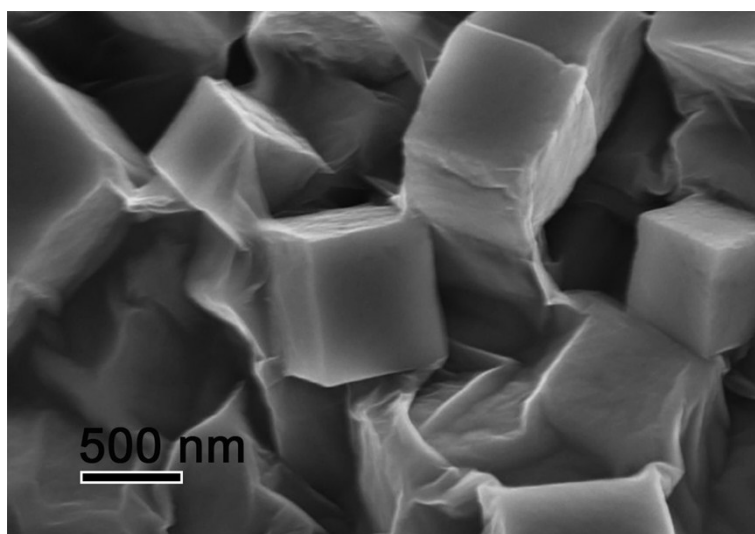

**Figure S1** SEM image of PB@GO.

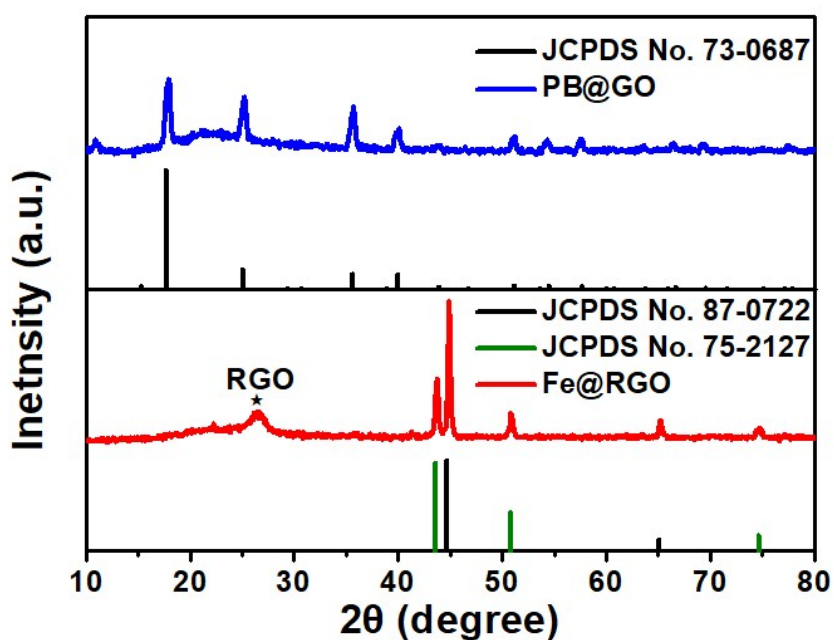

**Figure S2** XRD patterns of PB@GO and Fe@RGO.

In the XRD pattern of Fe@RGO, a broad peak at  $26^\circ$  is attributed to (002) facets of RGO. Other diffraction peaks are assigned to Fe (JCPDS card No. 87-0722) and  $\text{FeN}_{0.0324}$  (JCPDS card No. 75-2127). The result demonstrates that the RGO and Fe have been reduced after thermal treatment. The formation of  $\text{FeN}_{0.0324}$  is mainly due to the existence of N element in PB. According to the previous reports, during annealing progress in  $\text{N}_2$  or Ar atmosphere, transition metal anions will be reduced into pure transition metal, and CN- group linkers will form carbon compounds [1-3]. Furthermore, RGO is also an excellent reducing agent in high temperature, which is helpful for the reduction of Fe ion. Such phenomenon has been reported in other Co-Fe alloys, Ni-Fe alloys [1-3].

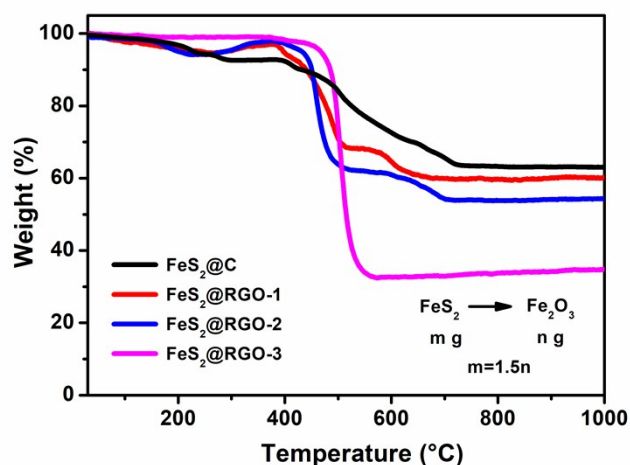

**Figure S3** TGA curves of FeS<sub>2</sub>@C, FeS<sub>2</sub>@RGO-1, FeS<sub>2</sub>@RGO-2 and FeS<sub>2</sub>@RGO-3.

TGA curves were carried out to evaluate the carbon content in the composite, as shown in Fig. S3. After being heated to 700 °C, the weights of the samples become stable, and 63.4%, 59.0%, 53.8% and 32.9% of the original weight are left for the final products for FeS<sub>2</sub>@C, FeS<sub>2</sub>@RGO-1, FeS<sub>2</sub>@RGO-2, FeS<sub>2</sub>@RGO-3, respectively. Due to the oxidation of FeS<sub>2</sub> to Fe<sub>2</sub>O<sub>3</sub> while the carbon to carbon dioxide, the carbon content of FeS<sub>2</sub>@C, FeS<sub>2</sub>@RGO-1, FeS<sub>2</sub>@RGO-2, FeS<sub>2</sub>@RGO-3 can be calculated, and corresponding values are 4.9%, 11.5%, 19.3% and 50.7%.

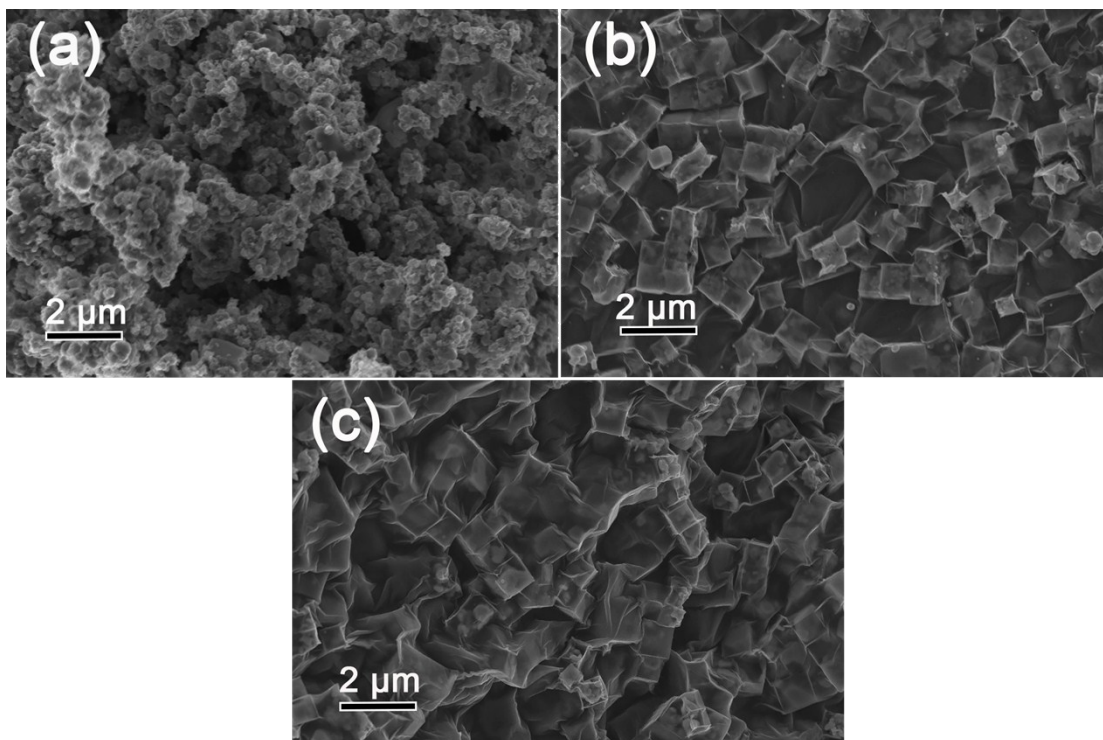

Figure S4 SEM images of (a)  $\text{FeS}_2@\text{C}$ , (b)  $\text{FeS}_2@\text{RGO-1}$  and (c)  $\text{FeS}_2@\text{RGO-3}$

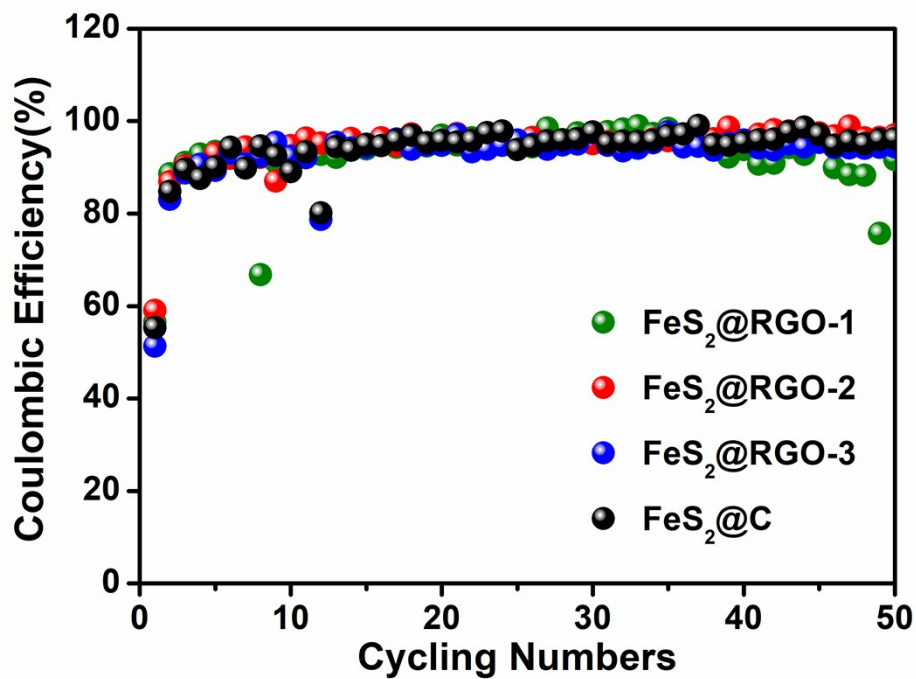

Figure. S5 Coulombic efficiencies of  $\text{FeS}_2@\text{C}$ ,  $\text{FeS}_2@\text{RGO-1}$ ,  $\text{FeS}_2@\text{RGO-2}$  and  $\text{FeS}_2@\text{RGO-3}$  at  $50 \text{ mA g}^{-1}$ .

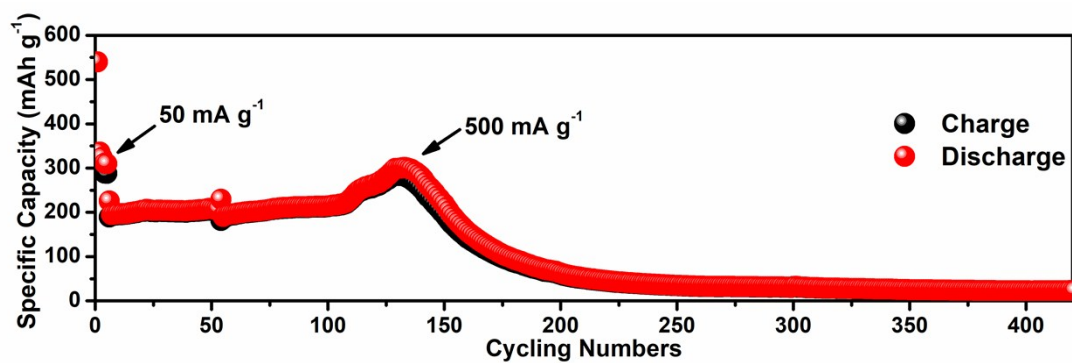

Figure S6 Long-term cycling performance of FeS<sub>2</sub>@RGO-1 at 500 mA g<sup>-1</sup>

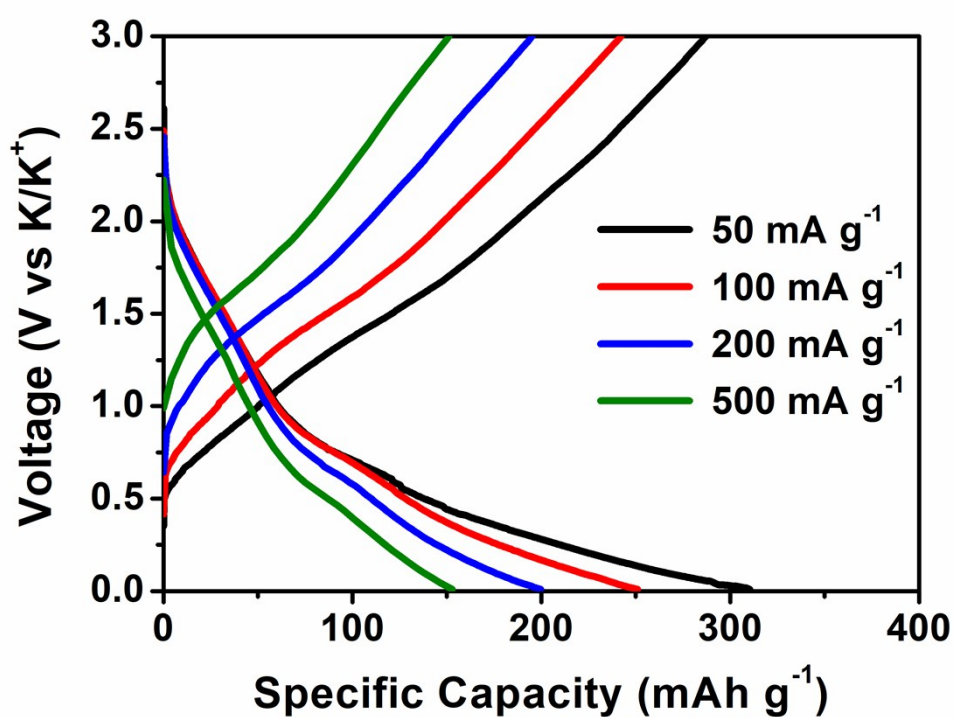

Figure S7 Galvanostatic charge-discharge curves of FeS<sub>2</sub>@RGO-2 electrode at different current densities.

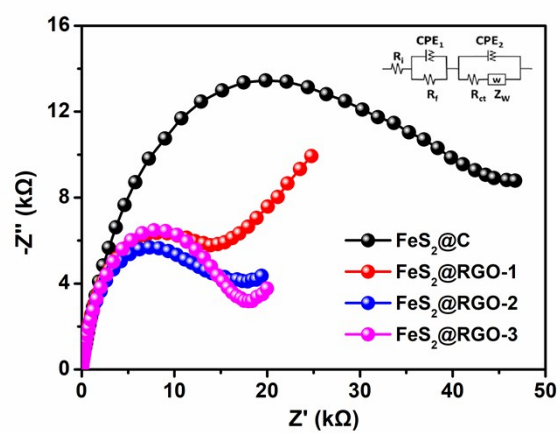

**Figure S8** EIS of  $FeS_2@C$ ,  $FeS_2@RGO-1$ ,  $FeS_2@RGO-2$  and  $FeS_2@RGO-3$  after 10 cycles.

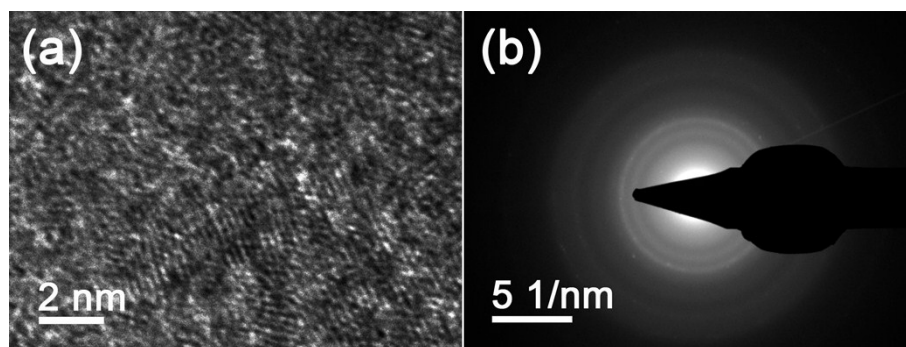

**Figure S9** (a) HRTEM image of  $FeS_2@RGO-2$  electrode when charging to 3.0 V and (b) the corresponding SAED image in the first cycle.

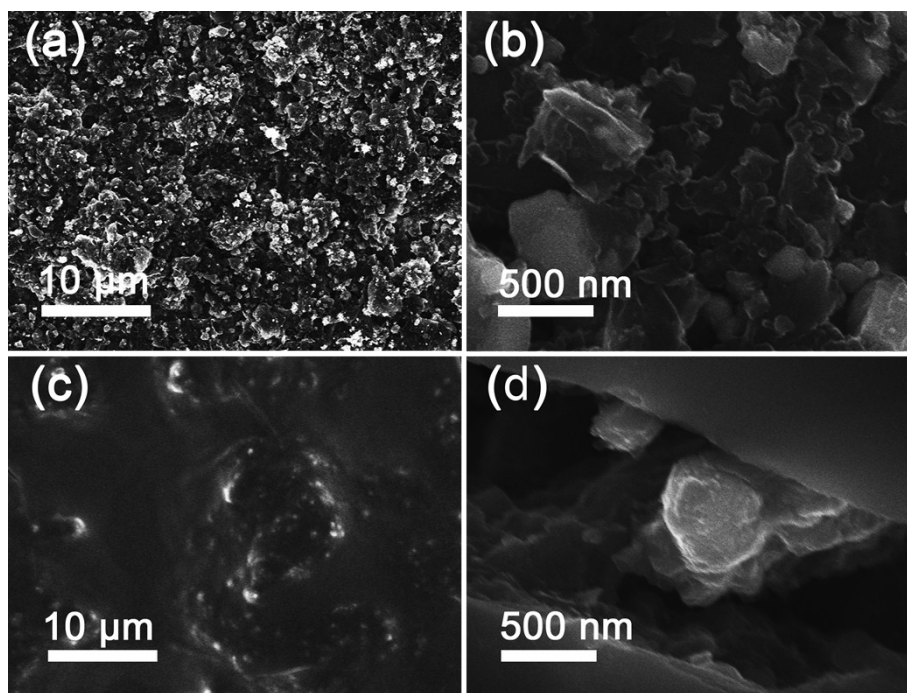

**Figure S10** SEM images of FeS<sub>2</sub>@RGO-2 electrodes. (a)-(b) before cycles, (c)-(d) after a number of cycles.

### Reference

- [1] P.W. Cai, S.Q. Ci, E.H. Zhang, P. Shao, C.S. Cao, Z.H. Wen, *Electrochim. Acta*, 220 (2016) 354-362.
- [2] X.J. Zheng, J. Deng, N. Wang, D.H. Deng, W.H. Zhang, X.H. Bao, C. Li, *Angew. Chem. Int. Edit.*, 53 (2014) 7023-7027.
- [3] Z.H. Yang, H.L. Lv, R.B. Wu, *Nano Res.*, 9 (2016) 3671-3682.
